# Supplementary material for: A LAT-Based Signaling Complex in the Immunological Synapse as Determined with Live Cell Imaging Is Less Stable in T Cells with Regulatory Capability
Source: MDPI journal article supplement (doi:10.3390/cells10020418), 2021-02-17
Supplement: s1 [file s1]

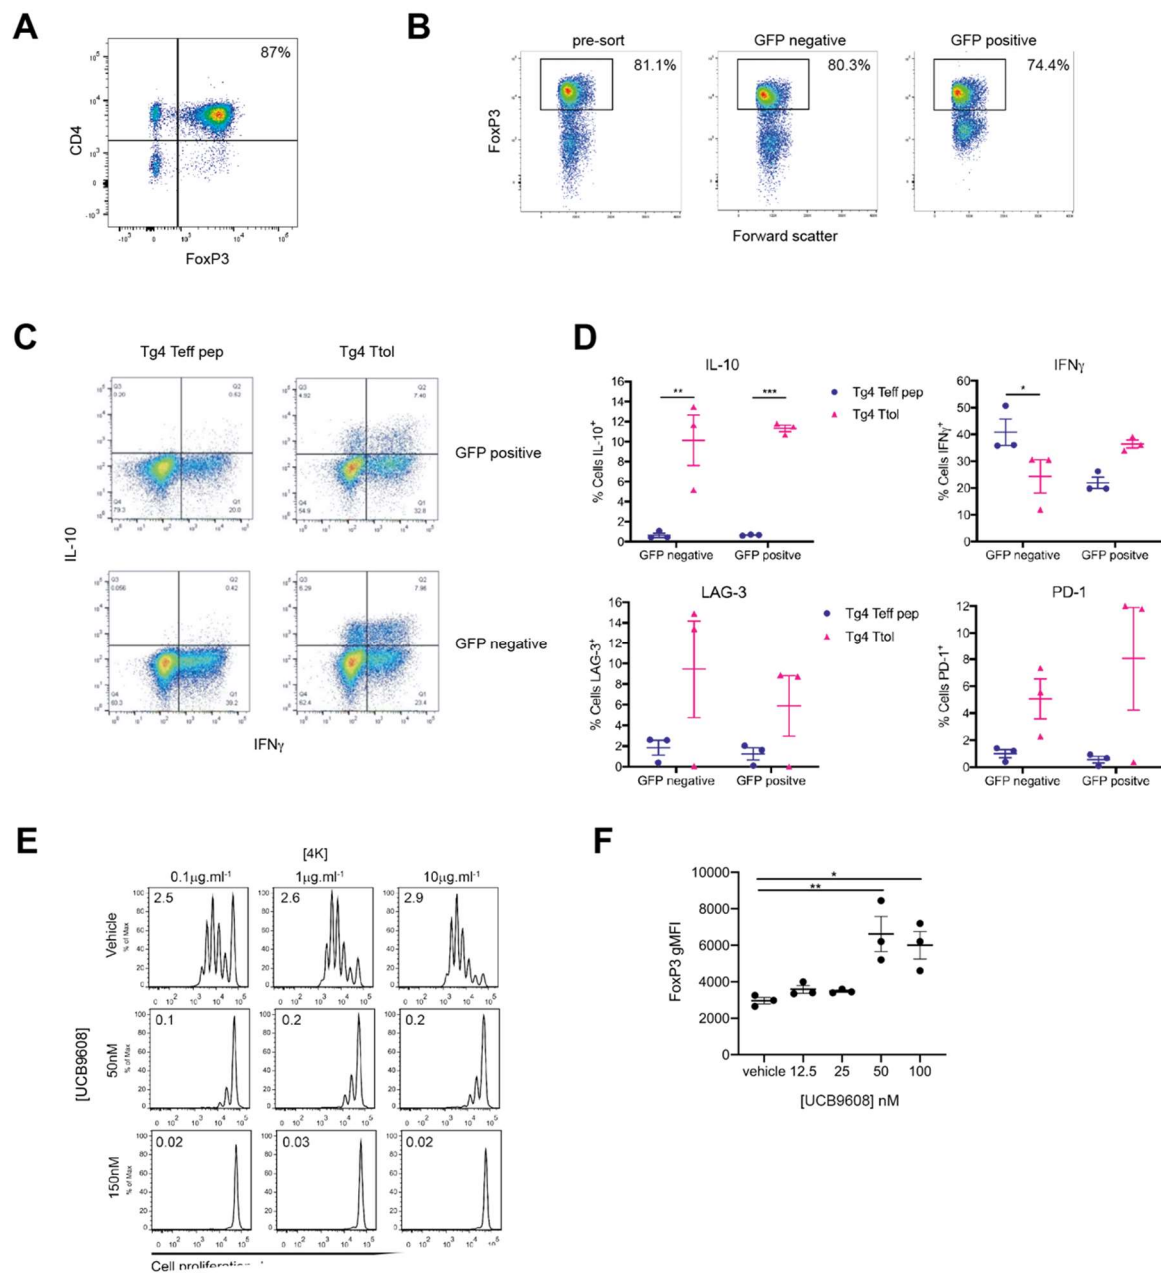

**Figure S1.** Three experimental models of T cells with regulatory capability. **A** Tg4 splenocytes were incubated with 10  $\mu\text{g}/\text{ml}$  MBP Ac1-9[4K] peptide for 5 days in the presence of 50 U/ml IL-2 or 10 ng/ml TGF $\beta$  and 100 U/ml IL-2 and stained for CD4 and FoxP3. One representative FACS plot of 12 for incubation with 10 ng/ml TGF $\beta$  and 100 U/ml IL-2. **B** Tg4 splenocytes were incubated with 10  $\mu\text{g}/\text{ml}$  MBP Ac1-9[4K] peptide for 5 days in the presence of 10 ng/ml TGF $\beta$  and 100 U/ml IL-2 and retrovirally transduced to express LAT-GFP, sorted into GFP $^{+}$  and GFP $^{-}$  cells and stained for FoxP3. One representative group of FACS plots of 2. **C** Tg4 T cells were tolerized *in vivo* with a dose escalation of MBP Ac1-9[4K] peptide in PBS or left untreated, incubated *in vitro* with 10  $\mu\text{g}/\text{ml}$  MBP Ac1-9[4K] peptide for 5 days in the presence of 50 U/ml IL-2, retrovirally transduced to express GFP, re-activated with PMA and Ionomycin and stained for LAG-3, PD-1, intracellular IL-10 and IFN $\gamma$ . One representative FACS plot of 3. **D** Tg4 T cells were tolerized *in vivo* with a dose escalation of MBP Ac1-9[4K] peptide in PBS or left untreated, incubated *in vitro* with 10  $\mu\text{g}/\text{ml}$  MBP Ac1-9[4K] peptide for 5 days in the presence of 50 U/ml IL-2, retrovirally transduced to express GFP, re-activated with PMA and Ionomycin and stained for LAG-3, PD-1, intracellular IL-10 and IFN $\gamma$ . Representative FACS blots are given in C. Data are expressed as % T cells positive for the indicated marker for Ttol cells expressing LAT-GFP ('GFP-positive') or not ('GFP-negative') (n=3). The data for LAT-GFP-expressing Ttol cells are the same as Figure 1E. \*  $p < 0.05$ , \*\*  $p < 0.01$ , \*\*\*  $p < 0.001$  **E** Naïve Tg4 T cells were labelled with the cell proliferation dye CellTrace Violet and incubated with irradiated splenocytes and the indicated concentrations of MBP Ac1-9[4K] peptide for 4 days in the presence of 50 U/ml IL-2 with the indicated concentration of UCB9608 or vehicle. One representative FACS plot of 3. **F** Tg4 splenocytes were incubated with 1  $\mu\text{g}/\text{ml}$   $\alpha$ -CD3 plus 2

$\mu\text{g/ml}$   $\alpha\text{-CD28}$  for 5 days in the presence of  $10\text{ ng/ml}$   $\text{TGF}\beta$  plus  $100\text{ U/ml}$   $\text{IL-2}$  with the indicated concentration of UCB9608 or vehicle and stained for FoxP3. Data are expressed as MFI of FoxP3<sup>+</sup>. One representative experiment of 2. \*  $p < 0.05$ , \*\*  $p < 0.01$ .

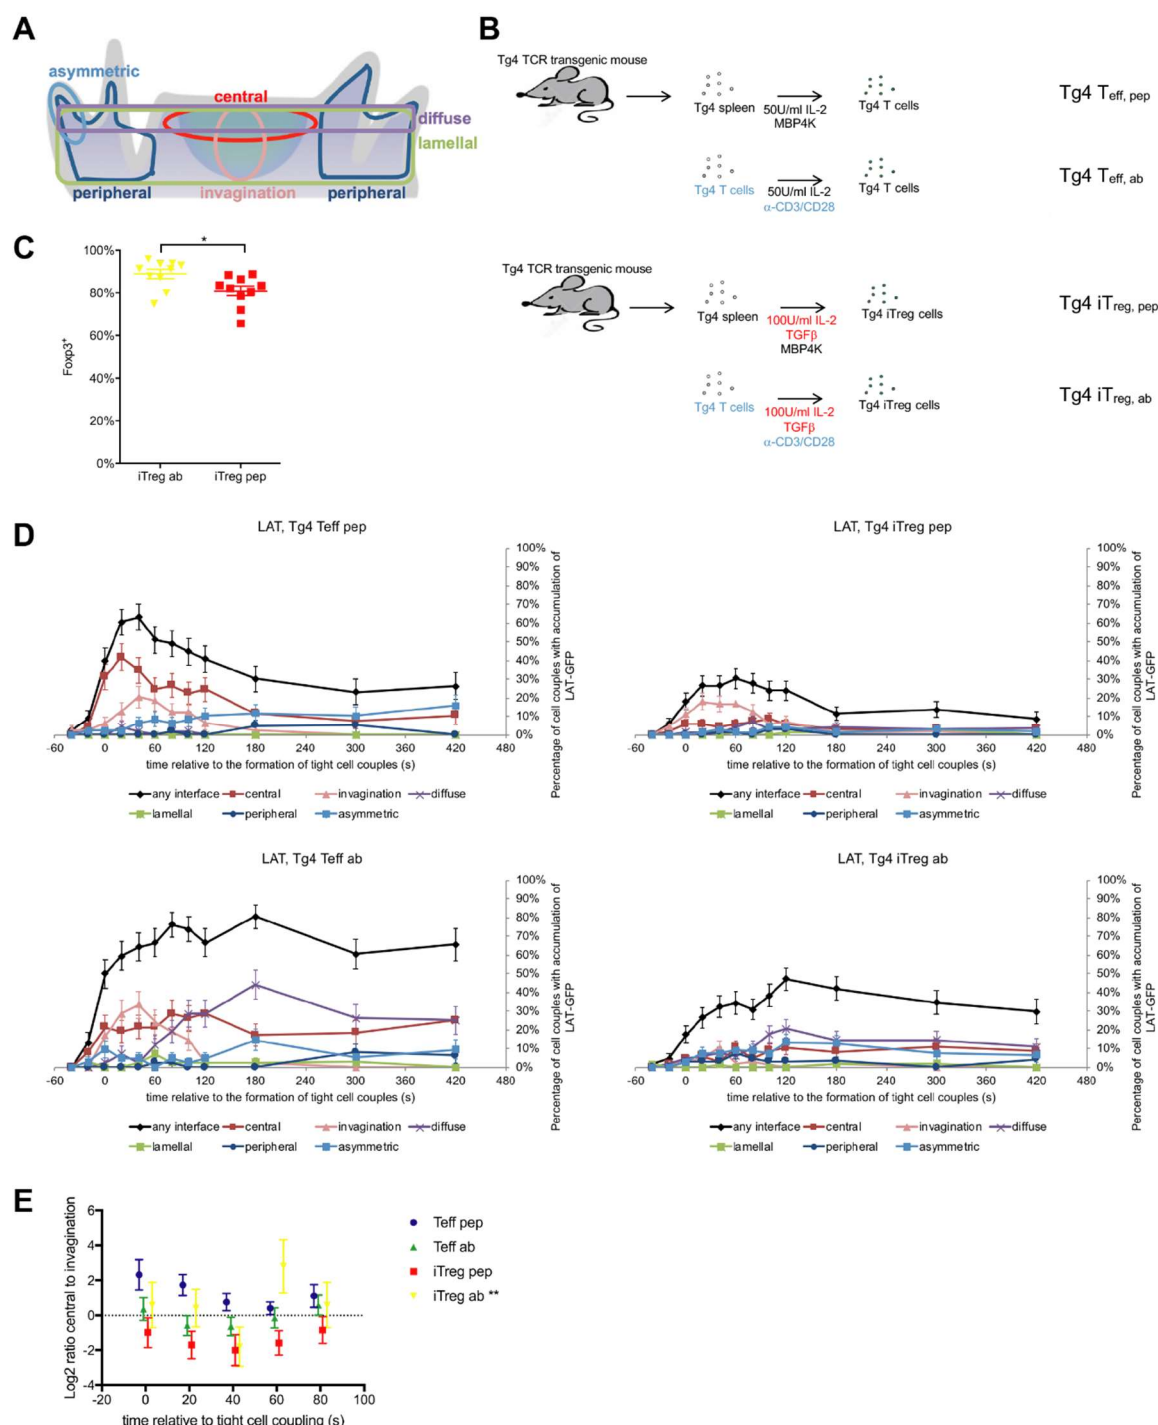

**Figure S2.** LAT association with the cSMAC is terminated more rapidly in T cells with regulatory capability. **A** The panel graphically represents the six categories used to classify spatiotemporal sensor distribution as underpinned by defined cell biological structures at the T cell:APC interface [21, 60]. The antigen-presenting cell above the T cell is not shown. Central reflects the cSMAC, lamellal an F-actin-based lamella extending from the undulating T cell plasma membrane deep into the T cell, peripheral the part of the actin network stabilizing the interface edge. Diffuse reflects cortical accumulation, invagination enrichment in a transient large T cell invagination and asymmetric individual small lamellae. **B,C** Purified CD4<sup>+</sup> Tg4 T cells were activated with  $1\text{ }\mu\text{g/ml}$   $\alpha\text{-CD3}$  plus  $2\text{ }\mu\text{g/ml}$   $\alpha\text{-CD28}$  in the presence of  $50\text{ U/ml}$   $\text{IL-2}$  or  $10\text{ ng/ml}$   $\text{TGF}\beta$  plus  $100\text{ U/ml}$   $\text{IL-2}$ . **B** Schematic comparison to activation of Tg4 splenocytes with MBP Ac1-9[4K] peptide. **C** Data are expressed as % FoxP3<sup>+</sup> cell at day 5 of tissue culture. iTreg pep data are from Figure 1B. **D,E** LAT association with the cSMAC is terminated more rapidly in T cells with regulatory capability. LAT-GFP accumulation is measured over time relative to the formation of tight cell couples (s) for various categories: any interface, central, invagination, diffuse, lamellal, peripheral, and asymmetric. LAT-GFP accumulation is measured as the percentage of cell couples with accumulation of LAT-GFP.

cells transduced to express LAT-GFP as indicated were activated with PL8 APCs (10  $\mu\text{g}/\text{ml}$  Ac1-9[4Y]). D Data are expressed as the percentage of cell couples with LAT-GFP accumulation in the indicated patterns (Supplementary Figure S2A) relative to tight cell couple formation. Number of cell couples analyzed are  $n=42$ , 68 for Teff ab, iTreg ab cells, respectively, from 2 and 5 independent experiments. Teff pep and iTreg pep data are from Figure 2B. Statistical significance of differences between conditions is given in Table S2. E The same data are expressed as the  $\log_2$  of the ratio of % Tg4 T cells with accumulation in the central over the invagination pattern relative to tight cell couple formation Teff pep and iTreg pep data are from Figure 2D. Data points are slightly nudged to increase legibility.  $**p<0.01$  vs. Teff ab.

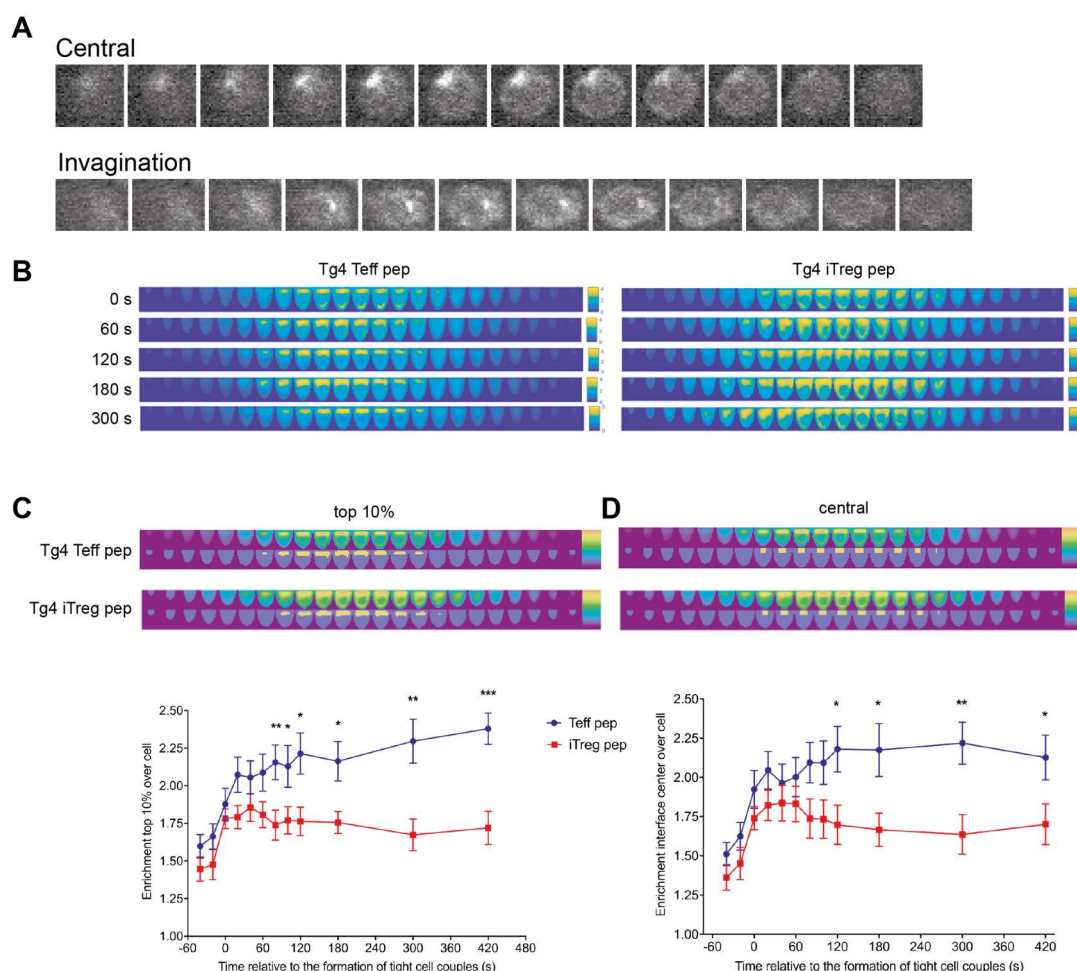

**Figure S3.** Representative imaging data and computational analysis of LAT accumulation in Tg4 Teff pep and iTreg pep cells. **A** Representative imaging data. Given are z-slices of the three-dimensional GFP fluorescence data of Tg4 Teff pep cells expressing LAT-GFP as bound to an APC (top left, right) with central and invagination accumulation as indicated. **B-D** Computational analysis of the same Teff pep and iTreg pep LAT-GFP data as in Figure 2B. **B** Population-averaged models of LAT-GFP accumulation in Teff pep and iTreg pep cells as indicated are given relative to tight cell couple formation in sequential z sections through the 3D model in a rainbow style false color scale. **C** On top, population and time-averaged models of LAT-GFP accumulation in Teff pep and iTreg pep cells as indicated are given as in A. Below the 10% of the cell volume with the highest LAT-GFP intensity is given in yellow. Data are expressed at the bottom as enrichment in the 10% of the cell volume with the highest LAT-GFP intensity relative to the rest of the cell relative to tight cell couple formation. **D** On top, population and time-averaged models of LAT-GFP accumulation in Teff pep and iTreg pep cells as indicated are given the same as in B. Below a cylinder representing the interface center is given in yellow. Data are expressed at the bottom as enrichment in the central interface cylinder relative to the rest of the cell relative to tight cell couple formation.

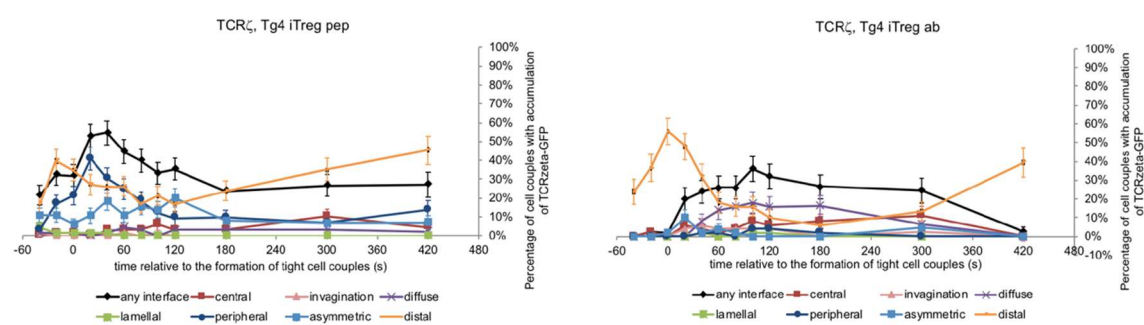

**Figure S4.** cSMAC formation was diminished but not abolished upon induction of a regulatory phenotype. Tg4 T cells as indicated transduced to express TCR $\zeta$ -GFP were activated with PL8 APCs (10  $\mu$ g/ml Ac1-9[4Y]). Data are expressed as the percentage of cell couples with TCR $\zeta$ -GFP accumulation in the indicated patterns (Supplementary Figure S2A) relative to tight cell couple formation. Number of cell couples analyzed is n=50 for iTreg ab cells from 3 independent experiments. iTreg pep data are from Figure 3B. Statistical significance of differences between conditions is given in Table S4.

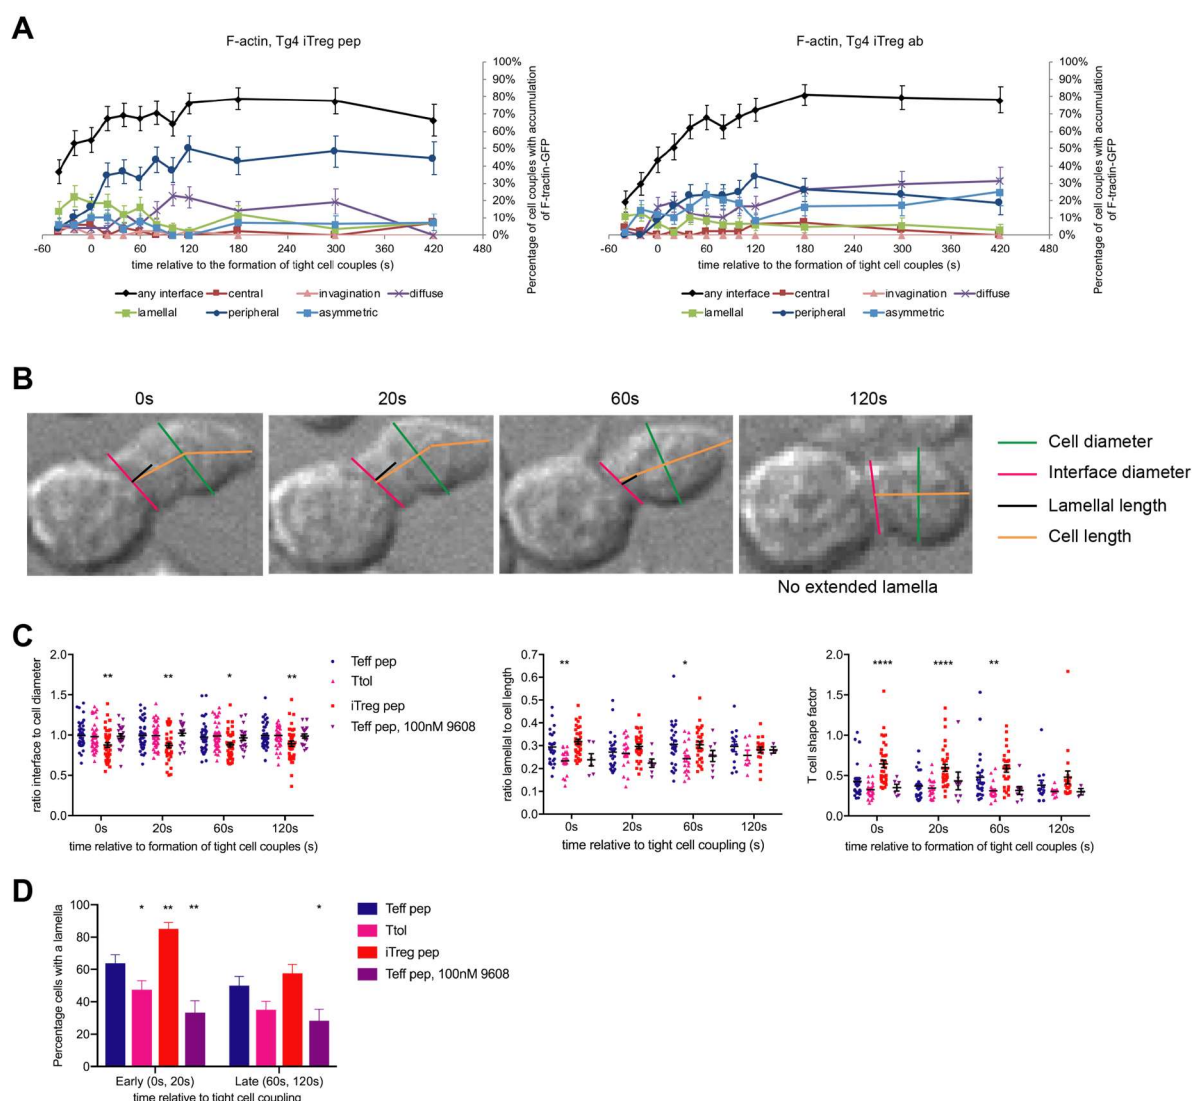

**Figure S5.** Actin-driven formation of a polarized cell couple is impaired upon induction of a regulatory phenotype. **A** Tg4 T cells as indicated transduced to express F-actin-GFP were activated with PL8 APCs (10  $\mu$ g/ml Ac1-9[4Y]). Data are expressed as the percentage of cell couples with F-actin-GFP accumulation in the indicated patterns (Supplementary Figure S2A) relative to tight cell couple formation. Number of cell couples analyzed is n=48 for iTreg ab cells from 3 independent experiments. iTreg pep data are from Figure 5B. Statistical significance of differences between conditions is given in Table S6. **B-D** Tg4 T cells as indicated transduced to express LAT-GFP were activated with PL8 APCs (10  $\mu$ g/ml



Ac1-9[4Y]). These are the same cells as in Fig. 2B. B The scheme indicates the way morphology measurements were taken. C On the left, data are expressed as the ratio of interface to cell diameter at the indicated time relative to tight cell coupling; in the middle, as the ratio of lamellar to cell length; on the right, as the T cell shape factor (ratio of lamellar length to interface diameter). D The same data are expressed as the percentage of Tg4 T cells with a distinct cell-wide lamellar sheet that the T cell uses to make contact with the APC at the indicated time relative to tight cell coupling.

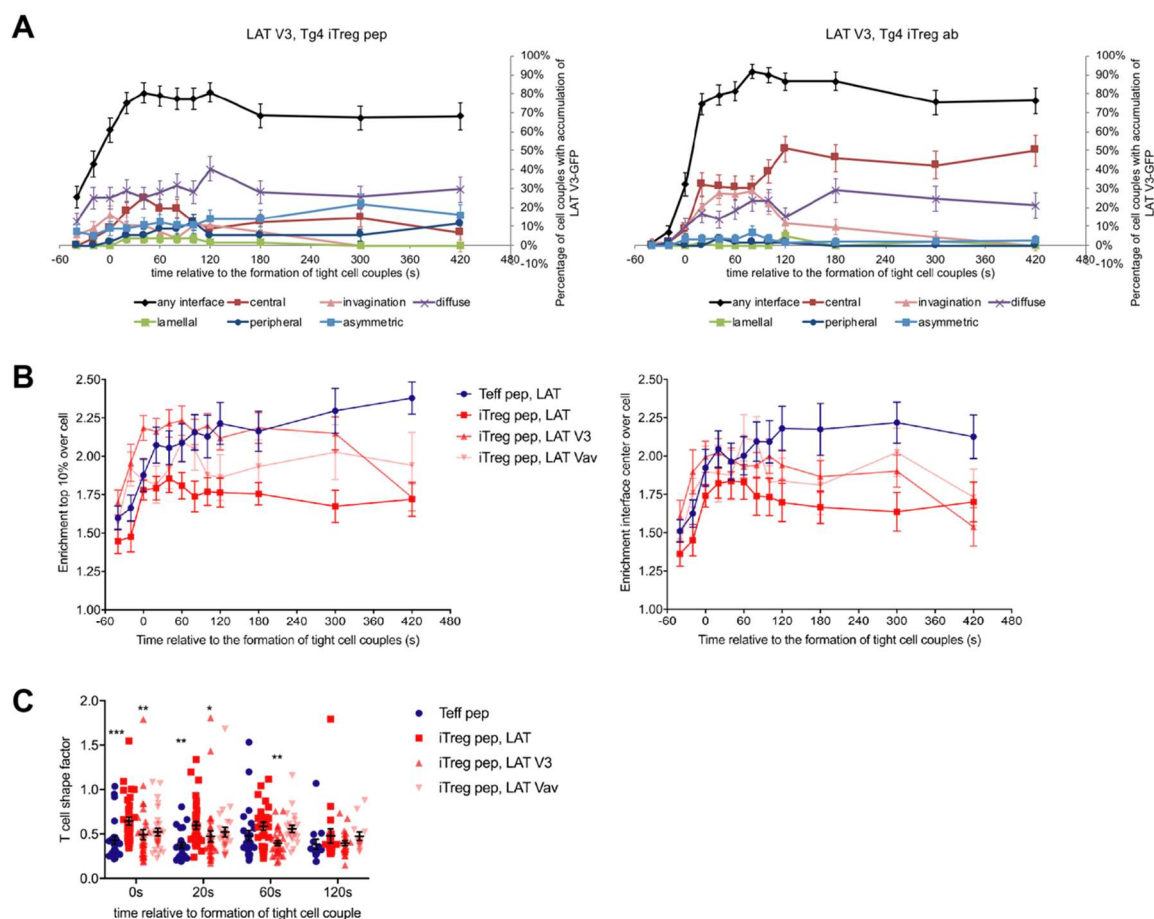

**Figure S6.** cSMAC formation can be partially restored with synthetic approaches in Tg4 iTreg pep cells. **A** Tg4 iTreg cells as indicated transduced to express LAT V3-GFP were activated with PL8 APCs (10  $\mu$ g/ml Ac1-9[4Y]). Data are expressed as the percentage of cell couples with LAT V3-GFP accumulation in the indicated patterns (Supplementary Figure S2A) relative to tight cell couple formation. Number of cell couples analyzed is  $n=59$  for iTreg ab cells from 4 independent experiments. iTreg pep data are from Figure 6B. Statistical significance of differences between conditions is given in Table S9. **B** Computational image analysis similar to Supplementary Figure S3 of the same data as in Figure 6B. On the left, data are expressed as enrichment in the 10% of the cell volume with the highest LAT-GFP, LAT-V3-GFP or LAT Vav-GFP intensity relative to the rest of the cell relative to tight cell couple formation. On the right, data are expressed as enrichment in the central interface cylinder relative to the rest of the cell relative to tight cell couple formation as indicated. LAT-GFP data are from Supplementary Figure S3. **C** Similar to Supplementary Figure S5C right, the same data as in Figure 6B are expressed as the T cell shape factor (ratio of lamellar length to interface diameter) at the indicated time relative to tight cell coupling. LAT-GFP data are from Supplementary Figure S5C.

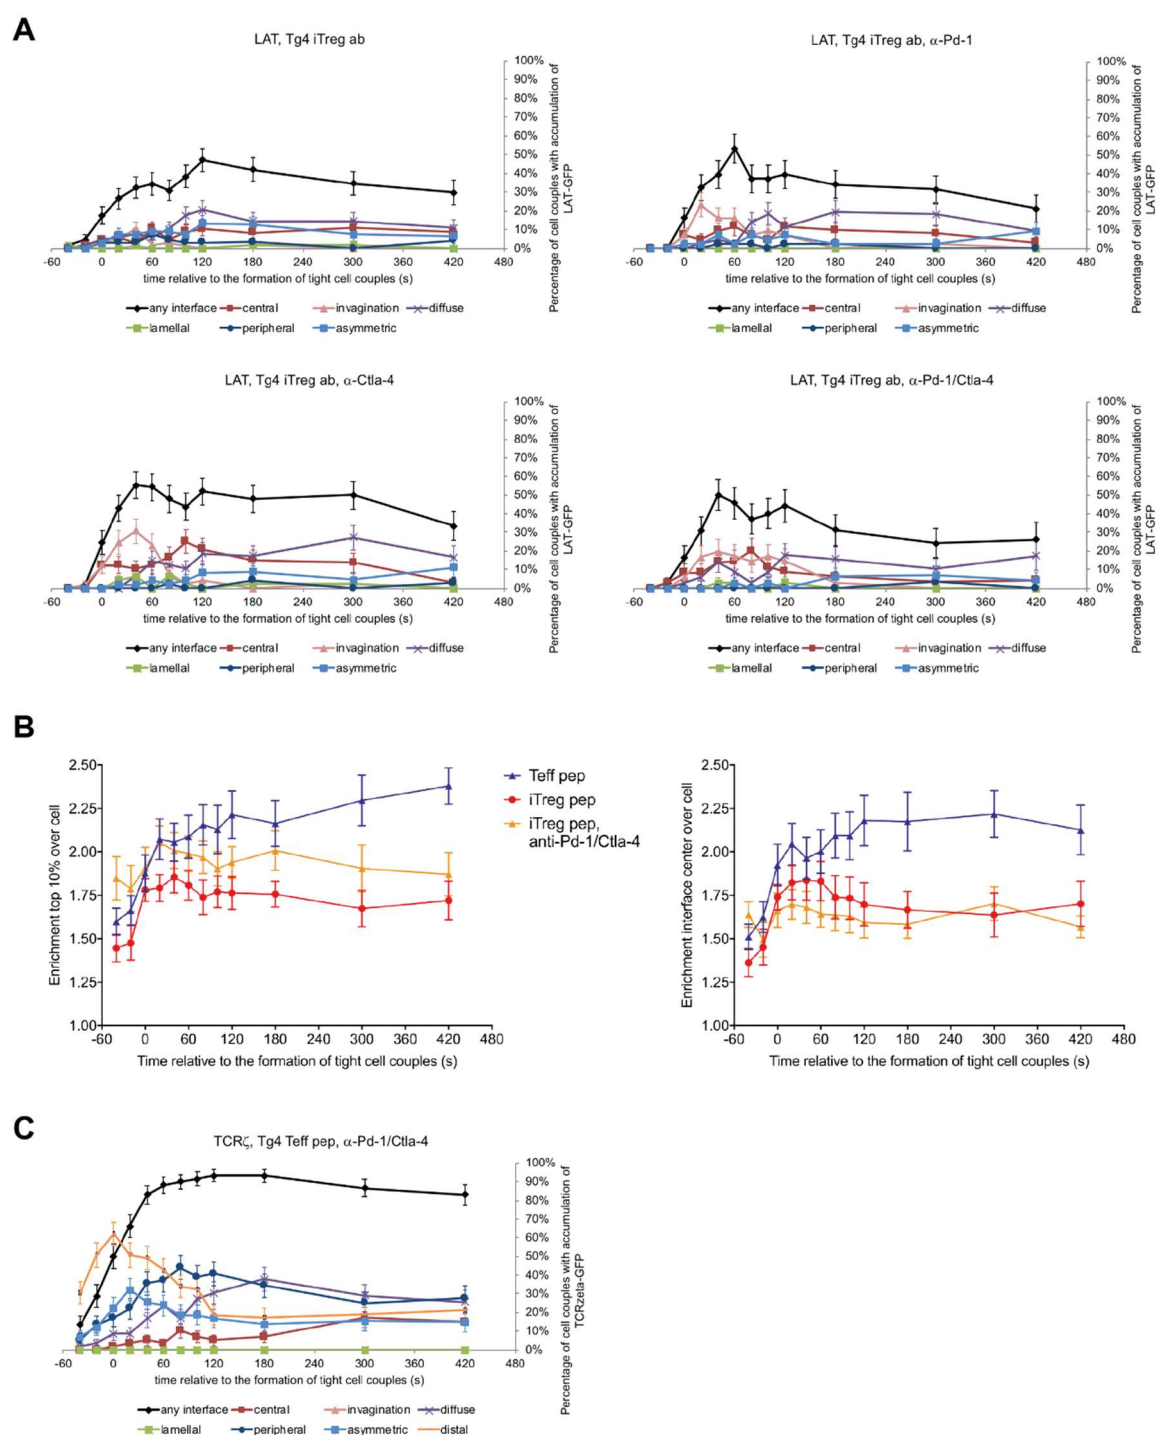

**Figure S7.** Pd-1 and Ctla-4 impair cSMAC formation upon induction of a regulatory phenotype. **A** Tg4 T cells as indicated transduced to express LAT-GFP were activated with PL8 APCs (10  $\mu$ g/ml Ac1-9[4Y]). Data are expressed as the percentage of cell couples with LAT-GFP accumulation in the indicated patterns (Supplementary Figure S2A) relative to tight cell couple formation. Number of cell couples analyzed are n=43, 49, 37 for iTreg ab cells in the presence of 10  $\mu$ g/ml  $\alpha$ -Pd-1, 10  $\mu$ g/ml  $\alpha$ -Ctla-4 and 10  $\mu$ g/ml  $\alpha$ -Pd-1 plus  $\alpha$ -Ctla-4, respectively, from 2-5 independent experiments each. Statistical significance of differences between conditions is given in Table S11. Tg4 iTreg ab buffer only data are from Supplementary Figure S2D. **B** Computational image analysis similar to Supplementary Figure S3 of the same data as in Figure 7B. On the left, data are expressed as enrichment in the 10% of the cell volume with the highest LAT-GFP intensity relative to the rest of the cell. On the right, data are expressed as enrichment in the central interface cylinder relative to the rest of the cell relative to tight cell couple formation. Tg4 Teff pep and iTreg pep data are from Supplementary Figure S3. **C** Tg4 T cells as indicated transduced to express TCR $\zeta$ -GFP were activated with PL8 APCs (10  $\mu$ g/ml Ac1-9[4Y]). The graphs display the percentage of cell couples with TCR $\zeta$ -GFP accumulation in the indicated patterns (Supplementary Figure S2A) relative to tight cell couple. Number of cell couples analyzed are n=59 from 2 independent experiments..

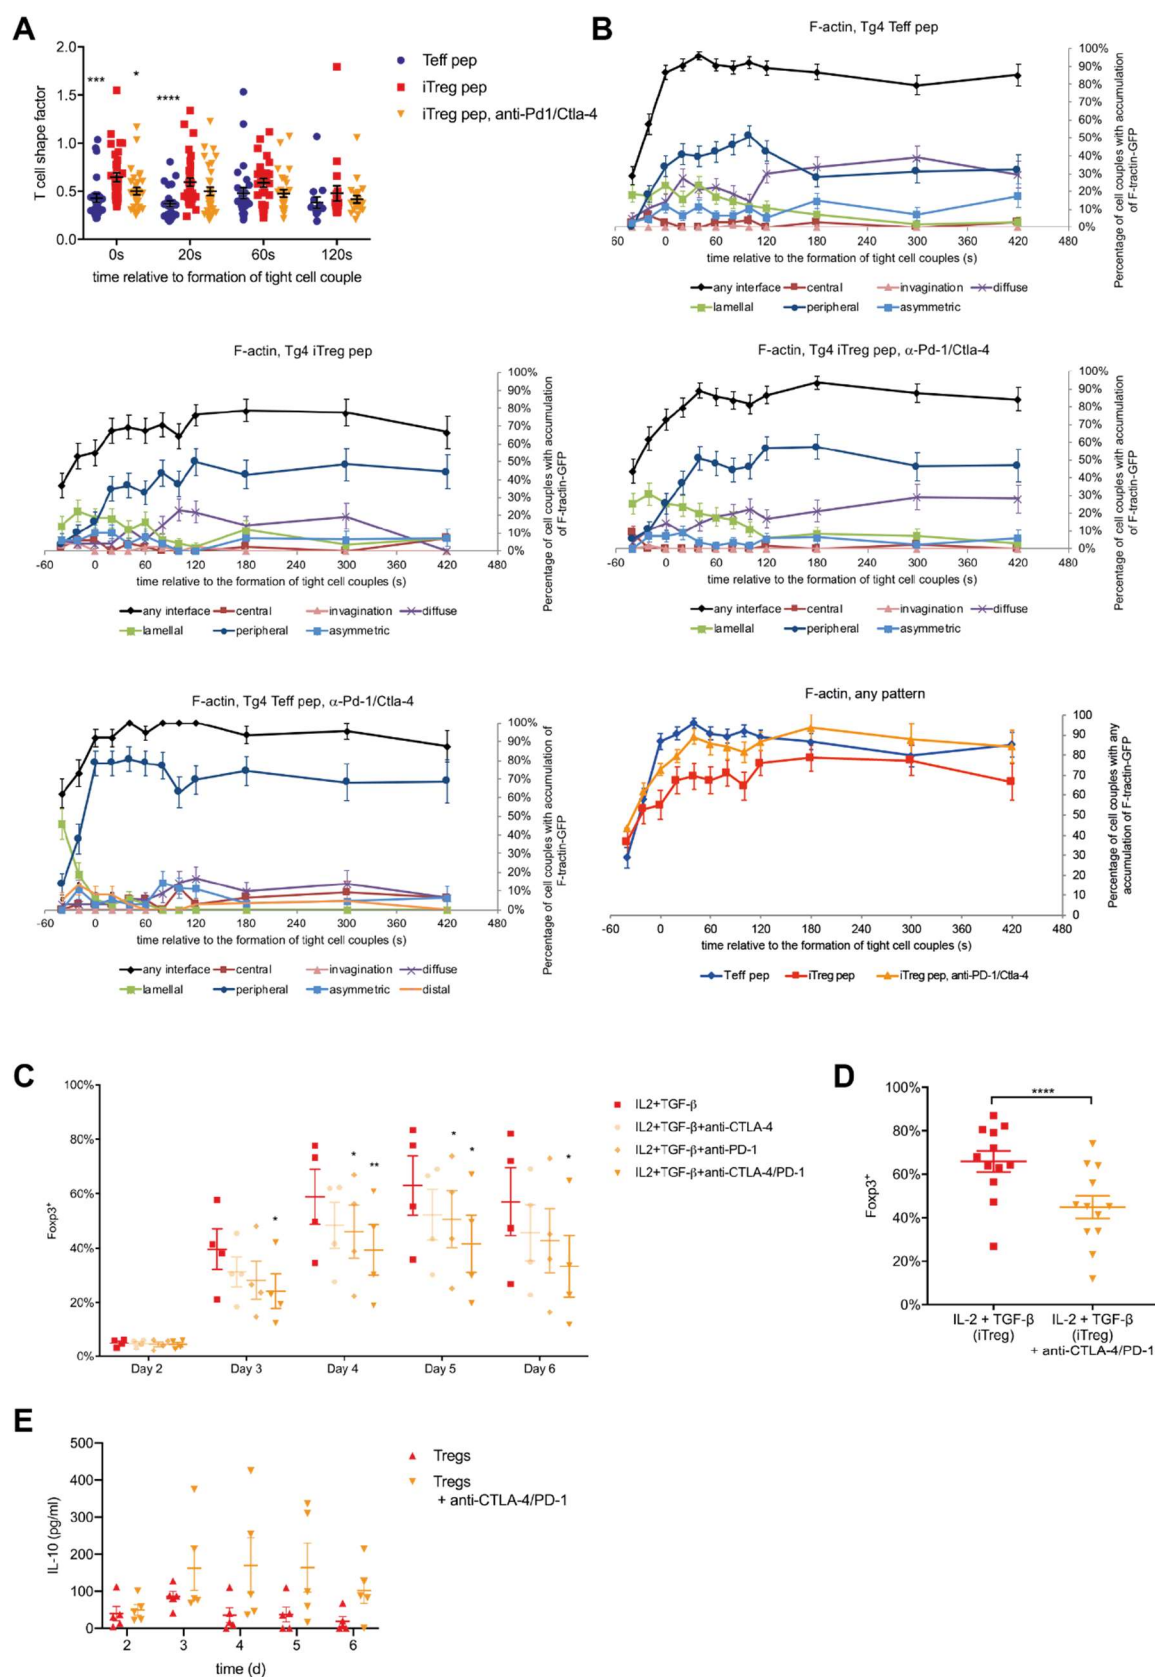

**Figure S8.** Pd-1 and Ctla-4 impair cytoskeletal dynamics and iTreg differentiation upon induction of a regulatory phenotype. **A** Tg4 T cells as indicated transduced to express LAT-GFP were activated with PL8 APCs (10  $\mu$ g/ml Ac1-9[4Y]). These are the same cells as in Figure 7B. Similar to Supplementary Figure S5C right, data are expressed as the T cell shape factor (ratio of lamellar length to interface diameter) at the indicated time relative to tight cell coupling. Teff pep and iTreg pep data are from Supplementary Figure S5C. \*  $p < 0.05$ , \*\*\*  $p < 0.001$ , \*\*\*\*  $p < 0.0001$  vs. iTreg pep at the same time. **B** Tg4 T

cells as indicated transduced to express F-tractin-GFP were activated with PL8 APCs (10  $\mu\text{g/ml}$  Ac1-9[4Y]). The graphs display the percentage of cell couples with F-tractin-GFP accumulation in the indicated patterns (Supplementary Figure S2A) relative to tight cell couple. Number of cell couples analyzed are  $n=56$ , 37 for iTreg pep, Teff pep cells in the presence of 10  $\mu\text{g/ml}$   $\alpha\text{-Pd-1}$  plus  $\alpha\text{-Ctla-4}$  from 3-5 independent experiments. Statistical significance of differences between conditions is given in Table S10. Control Teff pep and iTreg pep data are from Figure 5B. The panel in row three at the right is a direct comparison of accumulation in any pattern under the indicated three experimental conditions. **C, D** Tg4 splenocytes were incubated with 10  $\mu\text{g/ml}$  MBP Ac1-9[4K] peptide for 6 days in the presence of 10 ng/ml TGF $\beta$  plus 100 U/ml IL-2 upon addition of 10  $\mu\text{g/ml}$   $\alpha\text{-Pd-1}$ , 10  $\mu\text{g/ml}$   $\alpha\text{-Ctla-4}$ , 10  $\mu\text{g/ml}$   $\alpha\text{-Pd-1}$  plus  $\alpha\text{-Ctla-4}$  or buffer only. **C** Data are expressed as the percentage FoxP3<sup>+</sup> cells ( $n=4$  independent experiments). \*  $p<0.05$ , \*\*  $p<0.01$  vs. buffer only on the same day. **D** Data from a larger number of experiments including those in **E** are expressed as the percentage FoxP3<sup>+</sup> cells on day 6 only. The part of the data without antibody treatment are the same as Figure 1B. ( $n=12$ , 12 independent experiments). \*\*\*\*  $p<0.0001$ . **E** Tg4 splenocytes were incubated with 10  $\mu\text{g/ml}$  MBP Ac1-9[4K] peptide for 6 days in the presence of 10 ng/ml TGF $\beta$  plus 100 U/ml IL-2 upon addition of 10  $\mu\text{g/ml}$   $\alpha\text{-Pd-1}$  plus  $\alpha\text{-Ctla-4}$  or buffer only and IL-10 amounts in tissue culture supernatants were determined by ELISA. Data are expressed as amount of cytokine ( $n=4-5$  independent experiments). Data points are slightly nudged to increase legibility. The difference between  $\alpha\text{-Pd-1}$  plus  $\alpha\text{-Ctla-4}$  and buffer only is significant with  $p<0.01$  by 2-way ANOVA.

Table S1. Statistical analysis of Figure 2B.

| Condition     | Comparison     | Pattern                  | -40 | -20 | 0             | 20             | 40             | 60            | 80            | 100  | 120          | 180  | 300  | 420  |
|---------------|----------------|--------------------------|-----|-----|---------------|----------------|----------------|---------------|---------------|------|--------------|------|------|------|
| LAT, Teff pep | LAT, iTreg pep | any central invagination |     |     | 0.02<br>0.000 | 0.000<br>0.000 | 0.000<br>0.000 | 0.04<br>0.007 | 0.03<br>0.007 | 0.03 | 0.007        | 0.02 |      | 0.04 |
| LAT, Teff pep | LAT, Teff 9608 | any central invagination |     |     |               | 0.005<br>0.02  |                |               |               |      |              |      |      |      |
| LAT, Teff pep | LAT, Ttol      | any central invagination |     |     |               | 0.003          | 0.02           | 0.01          | 0.02          |      | 0.04<br>0.03 |      | 0.03 | 0.04 |

Table S2. Statistical analysis of Supplementary Figure S2D.

| Condition     | Comparison     | Pattern                  | -40 | -20 | 0                     | 20             | 40                      | 60             | 80                     | 100                   | 120   | 180   | 300   | 420   |
|---------------|----------------|--------------------------|-----|-----|-----------------------|----------------|-------------------------|----------------|------------------------|-----------------------|-------|-------|-------|-------|
| LAT, Teff ab  | LAT, iTreg ab  | any central invagination |     |     | 0.001<br>0.01<br>0.03 | 0.001<br>0.001 | 0.002<br>0.005<br>0.007 | 0.001<br>0.001 | 0.000<br>0.001<br>0.01 | 0.001<br>0.03<br>0.02 | 0.03  | 0.000 | 0.02  | 0.004 |
| LAT, Teff ab  | LAT, Teff pep  | any central invagination |     |     |                       | 0.04           |                         |                | 0.01                   | 0.01                  | 0.02  | 0.000 | 0.002 | 0.002 |
| LAT, iTreg ab | LAT, iTreg pep | any central invagination |     |     |                       | 0.02           |                         | 0.006          |                        |                       | 0.008 | 0.000 | 0.01  | 0.01  |

Table S3. Statistical analysis of Figure 3A, B.

| Condition              | Comparison              | Pattern            | -40   | -20   | 0    | 20    | 40    | 60    | 80    | 100  | 120   | 180  | 300   | 420           |
|------------------------|-------------------------|--------------------|-------|-------|------|-------|-------|-------|-------|------|-------|------|-------|---------------|
| DAG, Teff pep          | DAG, Ttol               | any central        |       |       |      |       | 0.02  | 0.001 | 0.02  | 0.03 | 0.006 | 0.03 |       |               |
| TCR $\zeta$ , Teff pep | TCR $\zeta$ , Ttol      | any central distal |       |       |      | 0.05  | 0.008 | 0.005 | 0.05  |      |       |      | 0.03  | 0.004<br>0.03 |
|                        | TCR $\zeta$ , iTreg pep | any central distal | 0.002 | 0.002 | 0.02 | 0.002 |       | 0.006 | 0.005 |      |       |      | 0.02  | 0.02<br>0.02  |
|                        |                         |                    |       |       |      |       |       |       |       |      |       |      | 0.008 | 0.000         |

Table S4. Statistical analysis of Supplementary Figure S4.

| Condition               | Comparison             | Pattern            | -40   | -20   | 0     | 20    | 40    | 60 | 80 | 100 | 120 | 180  | 300  | 420   |
|-------------------------|------------------------|--------------------|-------|-------|-------|-------|-------|----|----|-----|-----|------|------|-------|
| TCR $\zeta$ , iTreg pep | TCR $\zeta$ , iTreg ab | any central distal | 0.004 | 0.000 | 0.000 | 0.001 | 0.002 |    |    |     |     |      |      | 0.000 |
|                         |                        |                    |       |       | 0.04  | 0.04  |       |    |    |     |     | 0.02 | 0.02 |       |

Table S5. Statistical analysis of Figure 5B.



| Condition         | Comparison         | Pattern                                    | -40   | -20   | 0             | 20    | 40    | 60    | 80    | 100   | 120   | 180   | 300   | 420   |
|-------------------|--------------------|--------------------------------------------|-------|-------|---------------|-------|-------|-------|-------|-------|-------|-------|-------|-------|
| F-actin, Teff pep | F-actin, iTreg pep | any peripheral lamellal lamellal + diffuse |       |       | 0.000<br>0.05 | 0.002 | 0.000 | 0.002 | 0.02  | 0.000 |       |       |       |       |
|                   |                    |                                            |       |       |               | 0.03  | 0.04  |       |       |       |       |       |       | 0.04  |
| F-actin, Teff pep | F-actin, Teff 9608 | any peripheral lamellal lamellal + diffuse | 0.003 | 0.004 | 0.000         | 0.04  | 0.001 |       |       |       |       | 0.02  | 0.02  | 0.04  |
|                   |                    |                                            | 0.01  |       | 0.01          | 0.001 | 0.004 | 0.04  | 0.04  |       | 0.005 | 0.01  | 0.02  |       |
| F-actin, Teff pep | F-actin, Ttol      | any peripheral lamellal lamellal + diffuse |       |       | 0.01          |       |       | 0.001 |       | 0.02  | 0.02  | 0.001 |       |       |
|                   |                    |                                            |       |       | 0.03          | 0.000 | 0.000 | 0.000 | 0.007 | 0.006 | 0.000 | 0.000 | 0.002 | 0.006 |

Table S6. Statistical analysis of Supplementary Figure S5A.

| Condition          | Comparison        | Pattern                 | -40 | -20  | 0 | 20   | 40 | 60 | 80   | 100 | 120 | 180 | 300 | 420 |
|--------------------|-------------------|-------------------------|-----|------|---|------|----|----|------|-----|-----|-----|-----|-----|
| F-actin, iTreg pep | F-actin, iTreg ab | any peripheral lamellal |     | 0.04 |   | 0.02 |    |    | 0.05 |     |     |     |     |     |

Table S7. Statistical analysis of Figure 6B.

| Condition      | Comparison         | Pattern                  | -40   | -20   | 0             | 20            | 40             | 60            | 80            | 100   | 120           | 180   | 300           | 420   |
|----------------|--------------------|--------------------------|-------|-------|---------------|---------------|----------------|---------------|---------------|-------|---------------|-------|---------------|-------|
| LAT, iTreg pep | LAT V3, iTreg pep  | any central invagination | 0.000 | 0.000 | 0.000         | 0.000<br>0.05 | 0.000<br>0.001 | 0.000<br>0.03 | 0.000         | 0.000 | 0.000         | 0.000 | 0.000<br>0.05 | 0.000 |
| LAT, iTreg pep | LAT Vav, iTreg pep | any central invagination |       |       |               |               | 0.005<br>0.05  | 0.001         | 0.002<br>0.05 | 0.003 | 0.01          | 0.000 | 0.000         | 0.000 |
| LAT, Teff pep  | LAT V3, iTreg pep  | any central invagination | 0.007 | 0.000 | 0.05<br>0.009 | 0.01          |                | 0.005         | 0.005         | 0.001 | 0.000<br>0.05 | 0.000 | 0.000         | 0.000 |
| LAT, Teff pep  | LAT Vav, iTreg pep | any central invagination |       |       | 0.02          | 0.02          |                |               |               |       |               |       | 0.03          |       |

Table S8. Statistical analysis of Supplementary Figure S6A.

| Condition         | Comparison       | Pattern                  | -40 | -20 | 0 | 20 | 40   | 60    | 80    | 100   | 120   | 180   | 300   | 420   |
|-------------------|------------------|--------------------------|-----|-----|---|----|------|-------|-------|-------|-------|-------|-------|-------|
| LAT V3, iTreg pep | LAT V3, iTreg ab | any central invagination |     |     |   |    | 0.04 | 0.009 | 0.001 | 0.002 | 0.000 | 0.000 | 0.004 | 0.000 |

Table S9. Statistical analysis of Figure 7B, D, Supplementary Figure S8.

| Condition                                      | Comparison              | Pattern                                    | -40  | -20   | 0             | 20            | 40           | 60    | 80            | 100   | 120   | 180   | 300           | 420           |
|------------------------------------------------|-------------------------|--------------------------------------------|------|-------|---------------|---------------|--------------|-------|---------------|-------|-------|-------|---------------|---------------|
| LAT, iTreg pep, $\alpha$ -Pd-1/Ctla-4          | LAT Teff pep            | any central invagination                   |      |       |               | 0.01<br>0.000 | 0.03<br>0.03 |       |               |       |       |       |               |               |
|                                                | LAT iTreg pep           | any central invagination                   |      |       | 0.007<br>0.03 |               |              |       |               |       |       | 0.02  | 0.03          | 0.01          |
| F-tractin, iTreg pep, $\alpha$ -Pd-1/Ctla-4    | F-tractin Teff pep      | any peripheral lamellal Lamellal + diffuse |      |       |               |               |              |       |               |       |       | 0.003 |               |               |
|                                                | F-tractin iTreg pep     | any peripheral lamellal Lamellal + diffuse |      |       |               |               | 0.02         | 0.05  |               |       |       |       |               |               |
| TCR $\zeta$ , iTreg pep, $\alpha$ -Pd-1/Ctla-4 | TCR $\zeta$ , Teff pep  | any central distal                         | 0.01 | 0.000 | 0.000         | 0.000         | 0.001        | 0.004 | 0.004         | 0.003 | 0.008 | 0.000 |               |               |
|                                                | TCR $\zeta$ , iTreg pep | any central distal                         |      |       | 0.001         | 0.007         | 0.04         | 0.000 | 0.000<br>0.02 | 0.000 | 0.000 | 0.000 | 0.000<br>0.05 | 0.000<br>0.01 |

**Table S10.** Statistical analysis of Supplementary Figure S7A.

| Condition        | Comparison                              | Pattern                        | -40 | -20 | 0 | 20    | 40   | 60    | 80   | 100   | 120   | 180 | 300 | 420 |
|------------------|-----------------------------------------|--------------------------------|-----|-----|---|-------|------|-------|------|-------|-------|-----|-----|-----|
| LAT, iTreg<br>ab | LAT, iTreg<br>ab, $\alpha$ -Pd-1        | any<br>central<br>invagination |     |     |   | 0.007 |      | 0.01  |      |       |       |     |     |     |
| LAT, iTreg<br>ab | LAT, iTreg<br>ab, $\alpha$ -Ctla-4      | any<br>central<br>invagination |     |     |   | 0.003 | 0.01 | 0.001 |      | 0.03  |       |     |     |     |
| LAT, iTreg<br>ab | LAT, iTreg<br>ab, $\alpha$ -Pd-1/Ctla-4 | any<br>central<br>invagination |     |     |   |       |      | 0.01  | 0.02 | 0.001 | 0.006 |     |     |     |

**Video S1.** A representative interaction of a Tg4 T eff pep cell retrovirally transduced to express LAT-GFP with a PL8 B cell lymphoma APCs and 10  $\mu$ g/ml MBP Ac1-9[4Y] peptide is shown. DIC images are shown on the top, with matching top-down, maximum projections of 3D sensor fluorescence data on the bottom. The sensor fluorescence intensity is displayed in a rainbow-like, false-color scale (increasing from blue to red). 20 s intervals in video acquisition are played back as 2 frames per second. Cell coupling occurs in frame 4 (2s indicated video time).

**Video S2.** The video is displayed similar to Video S1. A Tg4 Ttol cell is transduced to express LAT-GFP and activated as in Video S1. Cell coupling occurs in frame 3 (1s indicated video time).

**Video S3.** The video is displayed similar to Video S1. A Tg4 iTreg cell is transduced to express LAT-GFP and activated as in Video S1. Cell coupling occurs in frame 5 (2s indicated video time).

**Video S4.** The video is displayed similar to Video S1. A Tg4 Teff iPI4K cell is transduced to express LAT-GFP and activated as in Video S1. Cell coupling occurs in frame 7 (3s indicated video time).

**Video S5.** The video is displayed similar to Video S1. A Tg4 T eff pep cell is transduced to express tandem C1 domain-GFP and activated as in Video S1. Cell coupling occurs in frame 6 (3s indicated video time).

**Video S6.** The video is displayed similar to Video S1. A Tg4 T eff pep cell is transduced to express TCR $\zeta$ -GFP and activated as in Video S1. Cell coupling occurs in frame 6 (3s indicated video time).

**Video S7.** The video is displayed similar to Video S1. A Tg4 T eff pep cell is transduced to express F-tractin-GFP and activated as in Video S1. Cell coupling occurs in frame 7 (3s indicated video time).

**Video S8.** The video is displayed similar to Video S1. A Tg4 iTreg cell is transduced to express LAT V3-GFP and activated as in Video S1. Cell coupling occurs in frame 7 (3s indicated video time).

**Video S9.** The video is displayed similar to Video S1. A Tg4 iTreg cell is transduced to express LAT-GFP and activated as in Video S1 upon addition of 10  $\mu$ g/ml  $\alpha$ -Pd-1 plus  $\alpha$ -Ctla-4. Cell coupling occurs in frame 8 (4s indicated video time).
