# Supplementary material for: A LAT-Based Signaling Complex in the Immunological Synapse as Determined with Live Cell Imaging Is Less Stable in T Cells with Regulatory Capability
Source: Cells. 2021 Feb 17;10(2):418. doi: 10.3390/cells10020418 (PMC7921939; doi:10.3390/cells10020418)
Supplement: Supplementary file 1 [file cells-10-00418-s001.zip]

Archive with 59 entries (56 files):
- supplement/
- supplement/cells-1042866-supplementary-captions.docx
- supplement/cells-1042866-supplementary.pdf
- supplement/Fig. S1.pdf
- supplement/Fig. S2.pdf
- supplement/Fig. S3.pdf
- supplement/Fig. S4.pdf
- supplement/Fig. S5.pdf
- supplement/Fig. S6.pdf
- supplement/Fig. S7.pdf
- supplement/Fig. S8.pdf
- supplement/table S1.docx
- supplement/table S10.docx
- supplement/table S2.docx
- supplement/table S3.docx
- supplement/table S4.docx
- supplement/table S5.docx
- supplement/table S6.docx
- supplement/table S7.docx
- supplement/table S8.docx
- supplement/table S9.docx
- supplement/Video S1.m4v
- supplement/Video S2.m4v
- supplement/Video S3.m4v
- supplement/Video S4.m4v
- supplement/Video S5.m4v
- supplement/Video S6.m4v
- supplement/Video S7.m4v
- supplement/Video S8.m4v
- supplement/Video S9.m4v
- __MACOSX/
- __MACOSX/supplement/
- __MACOSX/supplement/._Fig. S1.pdf
- __MACOSX/supplement/._Fig. S2.pdf
- __MACOSX/supplement/._Fig. S3.pdf
- __MACOSX/supplement/._Fig. S4.pdf
- __MACOSX/supplement/._Fig. S5.pdf
- __MACOSX/supplement/._Fig. S6.pdf
- __MACOSX/supplement/._Fig. S7.pdf
- __MACOSX/supplement/._Fig. S8.pdf
- __MACOSX/supplement/._table S1.docx
- __MACOSX/supplement/._table S10.docx
- __MACOSX/supplement/._table S2.docx
- __MACOSX/supplement/._table S3.docx
- __MACOSX/supplement/._table S4.docx
- __MACOSX/supplement/._table S5.docx
- __MACOSX/supplement/._table S6.docx
- __MACOSX/supplement/._table S7.docx
- __MACOSX/supplement/._table S8.docx
- __MACOSX/supplement/._table S9.docx
- __MACOSX/supplement/._Video S1.m4v
- __MACOSX/supplement/._Video S2.m4v
- __MACOSX/supplement/._Video S3.m4v
- __MACOSX/supplement/._Video S4.m4v
- __MACOSX/supplement/._Video S5.m4v
- __MACOSX/supplement/._Video S6.m4v
- __MACOSX/supplement/._Video S7.m4v
- __MACOSX/supplement/._Video S8.m4v
- __MACOSX/supplement/._Video S9.m4v
